# Supplementary material for: Altering synthetic fragments to tune the AIE properties and self-assemble grid-like structures of TPE-based oxacalixarenes
Source: Royal Society of Chemistry journal article supplement (doi:10.1039/c5ra15214c), 2015-01-01
Supplement: c5ra15214c1.pdf [file c5ra15214c1.pdf]

## Electronic Supplementary Information

### Altering Synthetic Fragments to Tune the AIE Properties and Self-assemble Grid-like Structures of TPE-based Oxacalixarenes

Zhen Wang,<sup>‡a</sup> Hong Cheng,<sup>‡b</sup> Tian-Long Zhai,<sup>a</sup> Xianggao Meng<sup>\*c</sup> and Chun Zhang<sup>\*a</sup>

<sup>a</sup>*College of Life Science and Technology, Huazhong University of Science and Technology, and National Engineering Research Center for Nanomedicine, Wuhan, 430074, China.*

<sup>b</sup>*Analytical and Testing Center, Huazhong University of Science and Technology, Wuhan, 430074, China.*

<sup>c</sup>*School of Chemistry, Central China Normal University, Wuhan 430079, China.*

Email: [chunzhang@hust.edu.cn](mailto:chunzhang@hust.edu.cn)

|                                                                                        |    |
|----------------------------------------------------------------------------------------|----|
| 1. <sup>1</sup> H NMR and <sup>13</sup> C NMR spectra of <b>1a</b> and <b>1b</b> ----- | S2 |
| 2. IR spectra of <b>1a</b> and <b>1b</b> -----                                         | S4 |
| 3. Crystal structures of <b>1a</b> -----                                               | S5 |
| 4. Crystal structures of <b>1b</b> -----                                               | S5 |
| 5. The Self-assemblies of <b>1a</b> in water/THF-----                                  | S6 |
| 6. Fluorescent titration experiments of <b>1a</b> -----                                | S7 |

# 1. $^1\text{H}$ NMR and $^{13}\text{C}$ NMR spectra of 1a and 1b

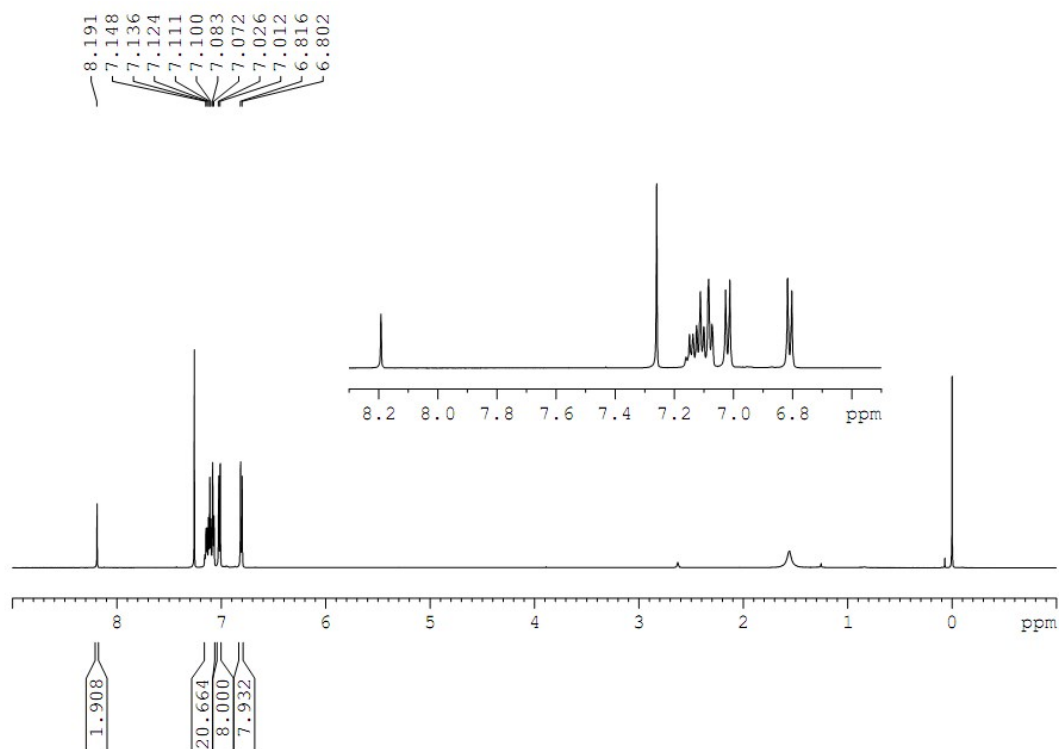

Fig. S1  $^1\text{H}$  NMR spectrum (600 MHz,  $\text{CDCl}_3$ ) of 1a.

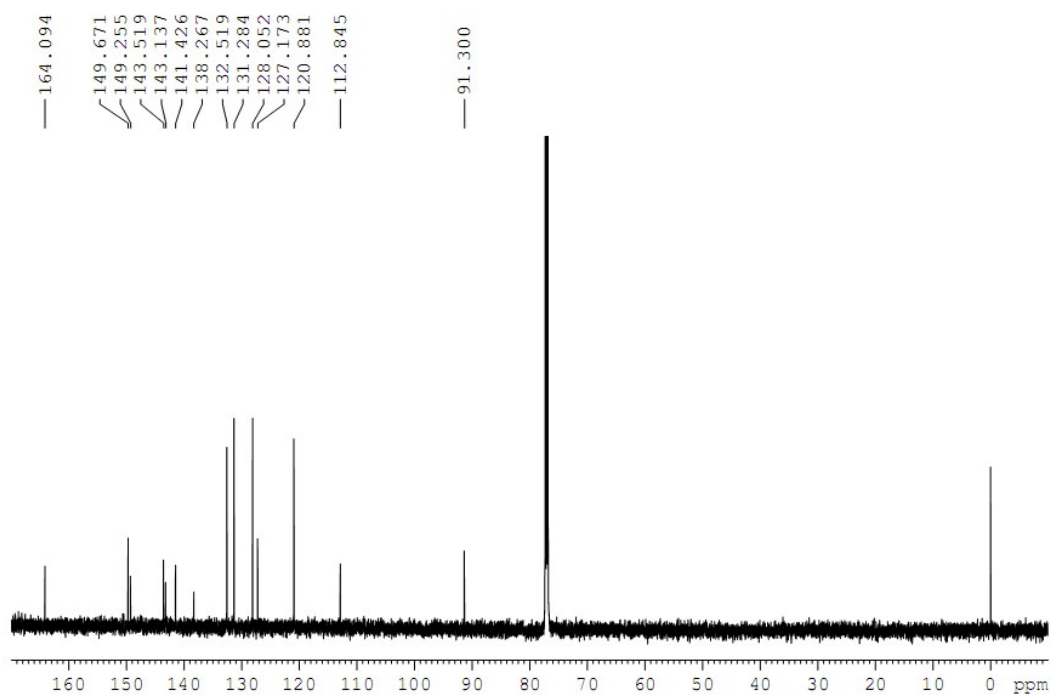

Fig. S2  $^{13}\text{C}$  NMR spectrum (150 MHz,  $\text{CDCl}_3$ ) of 1a.

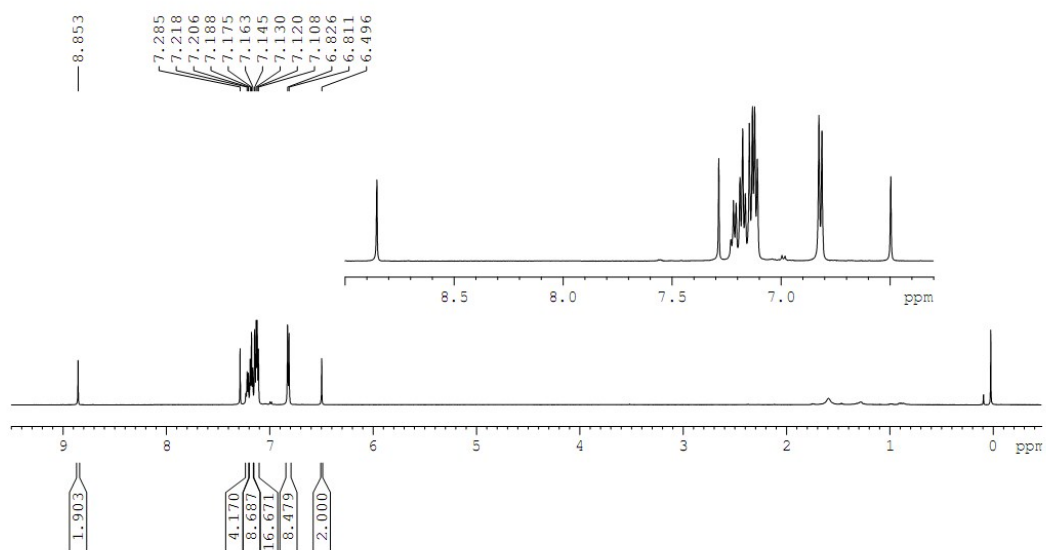

**Fig. S3** <sup>1</sup>H NMR spectrum (600 MHz, CDCl<sub>3</sub>) of **1b**.

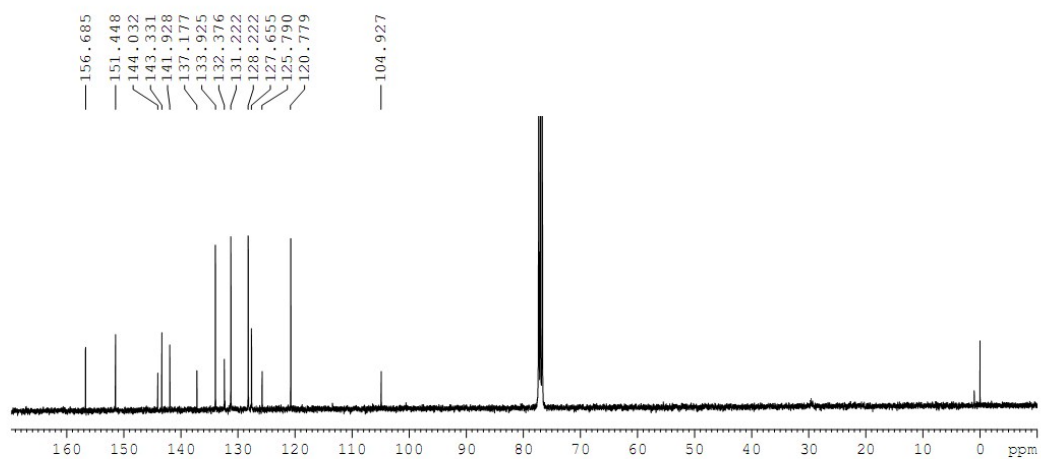

**Fig. S4** <sup>13</sup>C NMR spectrum (150 MHz, CDCl<sub>3</sub>) of **1b**.

## 2. IR spectra of 1a and 1b

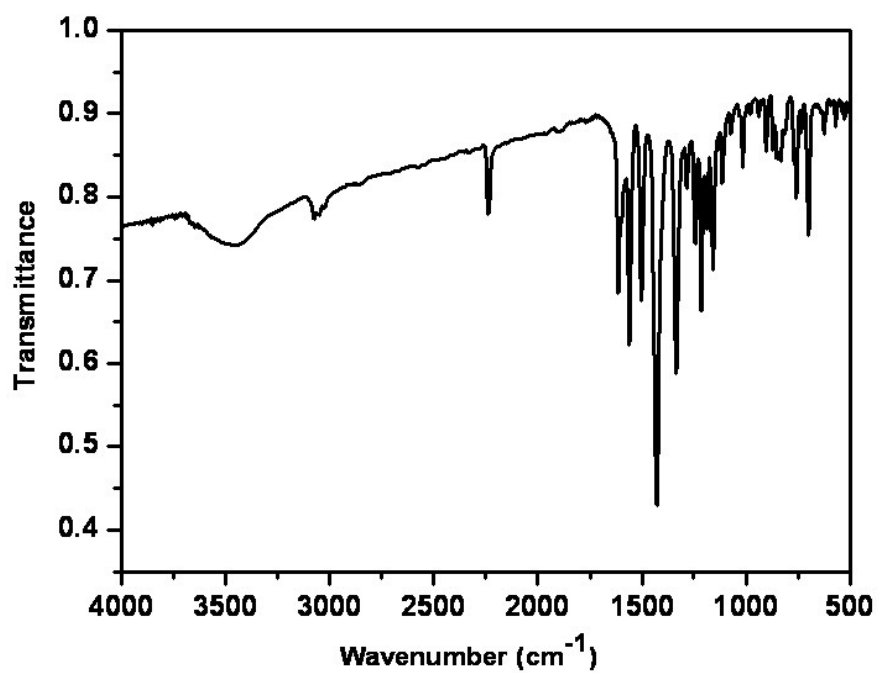

Fig. S5 IR spectrum of 1a.

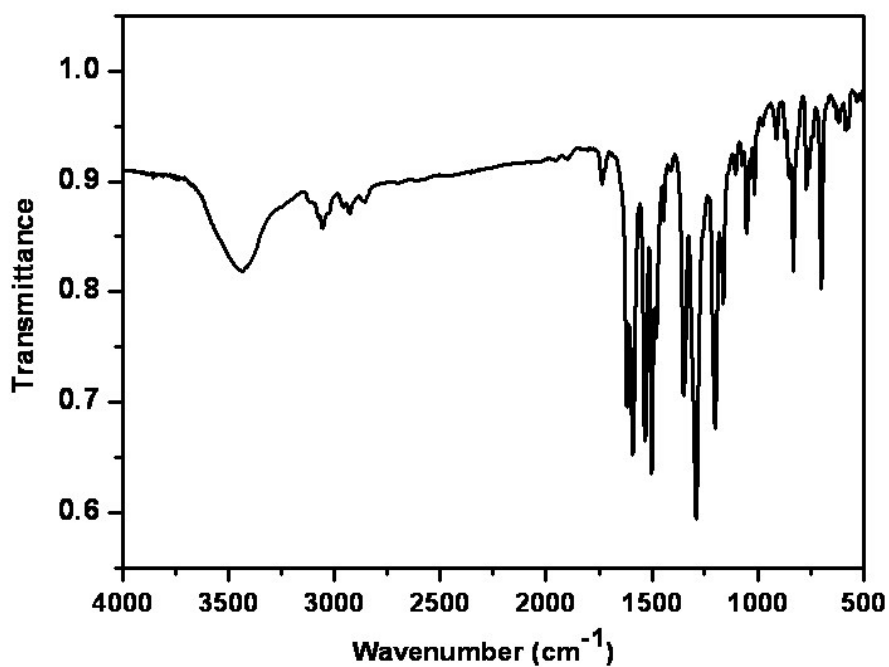

Fig. S6 IR spectrum of 1b.

### 3. Crystal structure of 1a.

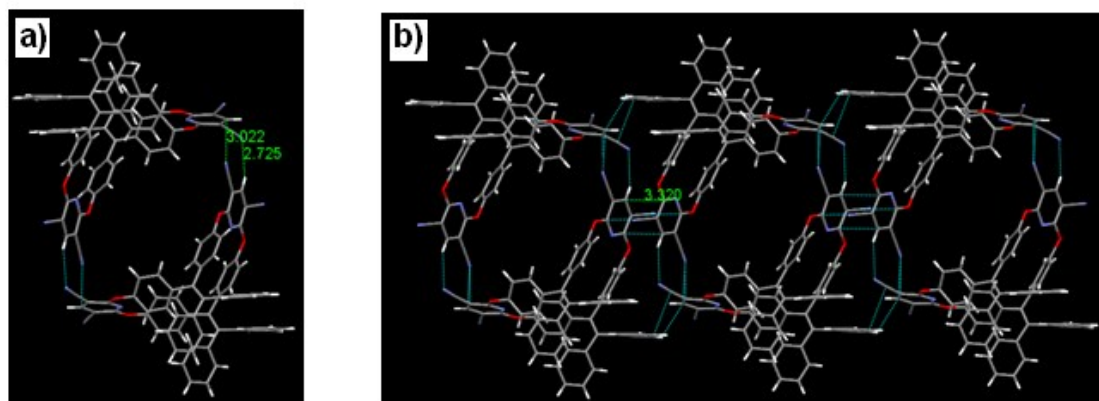

**Fig.S7** The dimmer structures (a), and one-dimensional linear grid structure (c) of oxacalixarene **1a**.

### 4. Crystal structure of 1b.

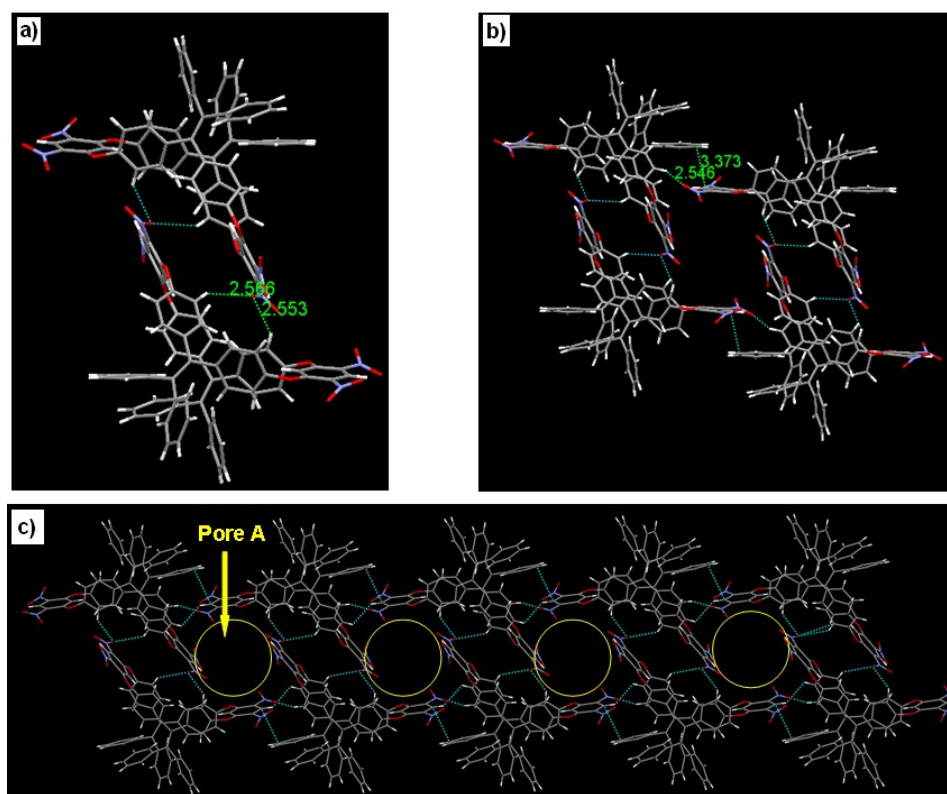

**Fig. S8** The dimmer structures (a), the grid-like pore A (b) and one-dimensional linear grid structure (c) of oxacalixarene **1b**.

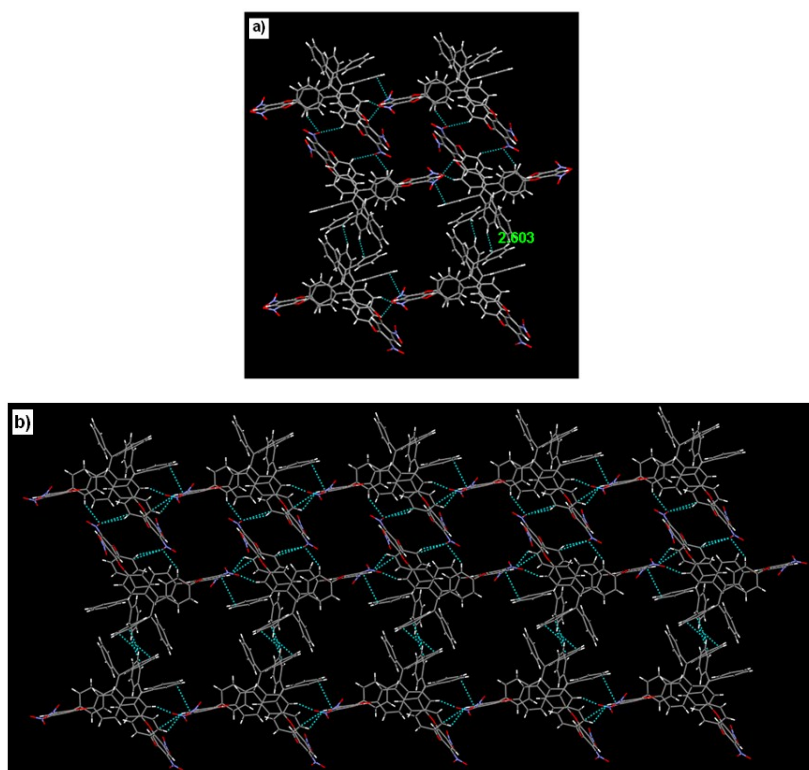

**Fig. S9** The grid-like pore B (a) and two-dimensional grid structure (b) of oxacalixarene **1b**.

## 5. The Self-assemblies of **1a** in water/THF

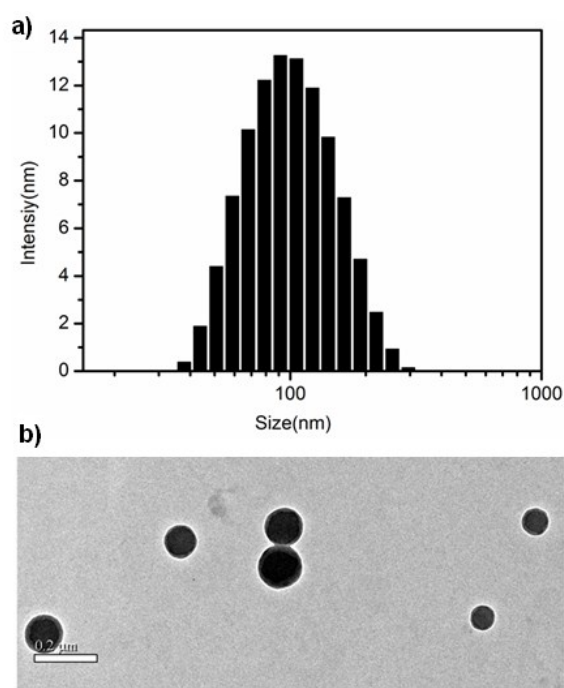

**Fig.S10** The hydrodynamic size (a) and TEM image (b) of **1a** in water/THF (95/5) with concentration of 0.1 mg/mL.

## 6. The fluorescent titration experiments of **1a** for different quenchers.

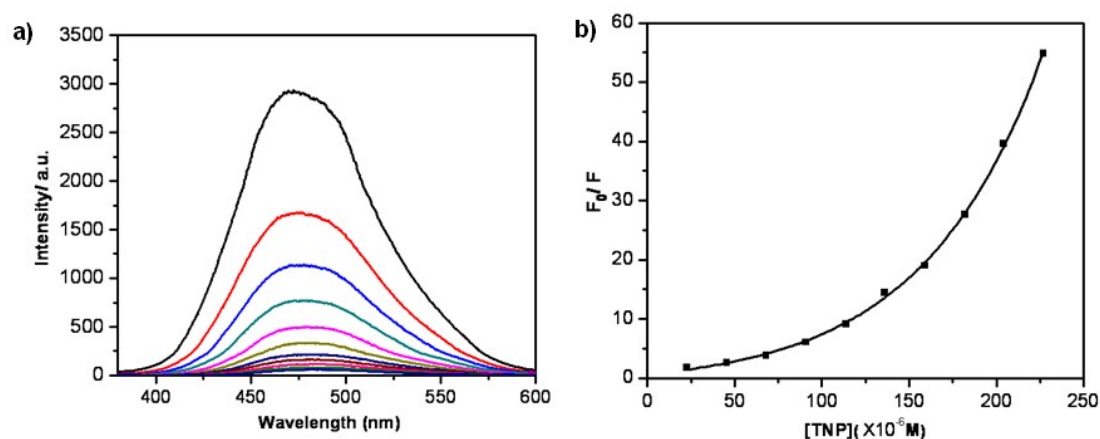

**Fig. S11** (a) Emission spectra ( $\lambda_{\text{ex}} = 350$  nm) of **1a** ( $4.5 \times 10^{-6}$  M) in presence of TNP at various concentration (0, 5, 10, 15, 20, 25, 30, 35, 40, 45 and 50 equiv.). (b) The nonlinear curve-fitting for the quenching constant of **1a** with TNP.

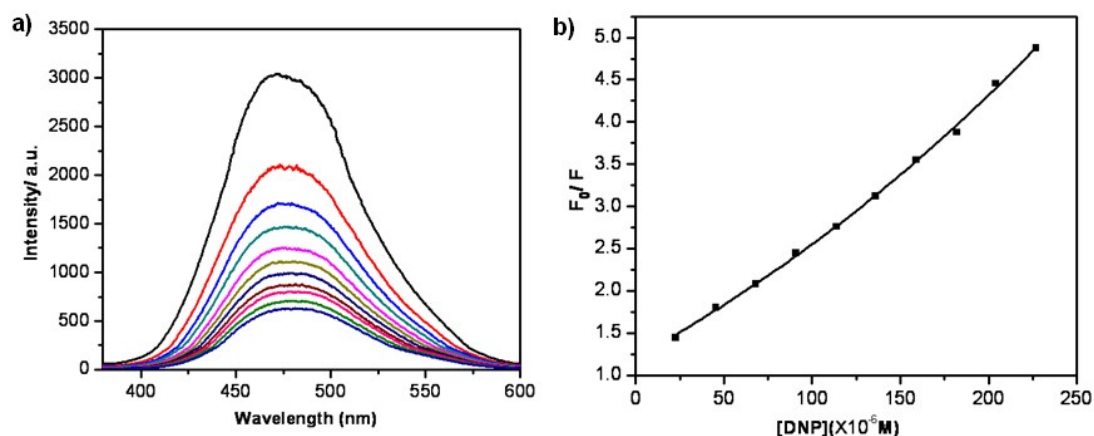

**Fig.S12** (a) Emission spectra ( $\lambda_{\text{ex}} = 350$  nm) of **1a** ( $4.5 \times 10^{-6}$  M) in presence of DNP at various concentration (0, 5, 10, 15, 20, 25, 30, 35, 40, 45 and 50 equiv.). (b) The nonlinear curve-fitting for the quenching constant of **1a** with DNP.

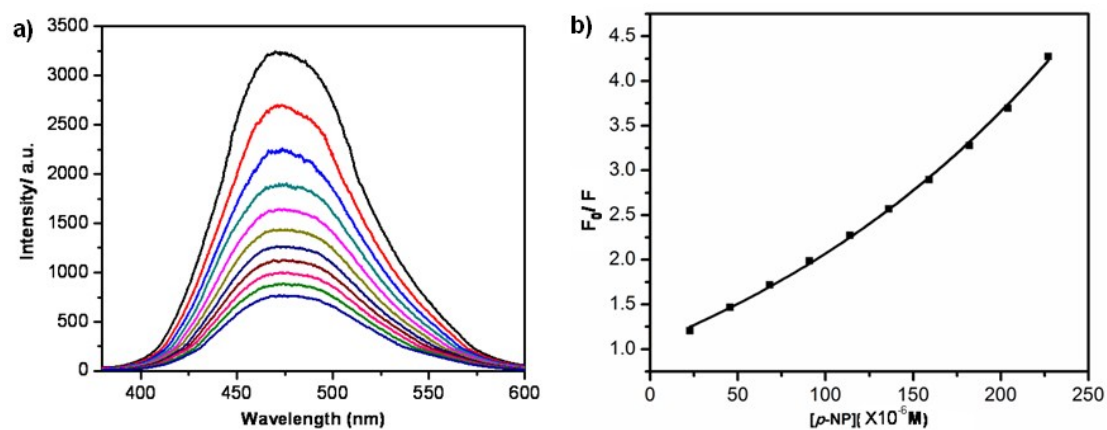

**Fig. S13** (a) Emission spectra ( $\lambda_{\text{ex}} = 350$  nm) of **1a** ( $4.5 \times 10^{-6}$  M) in presence of *p*-NP at various concentration (0, 5, 10, 15, 20, 25, 30, 35, 40, 45 and 50 equiv.). (b) The nonlinear curve-fitting for the quenching constant of **1a** with *p*-NP.

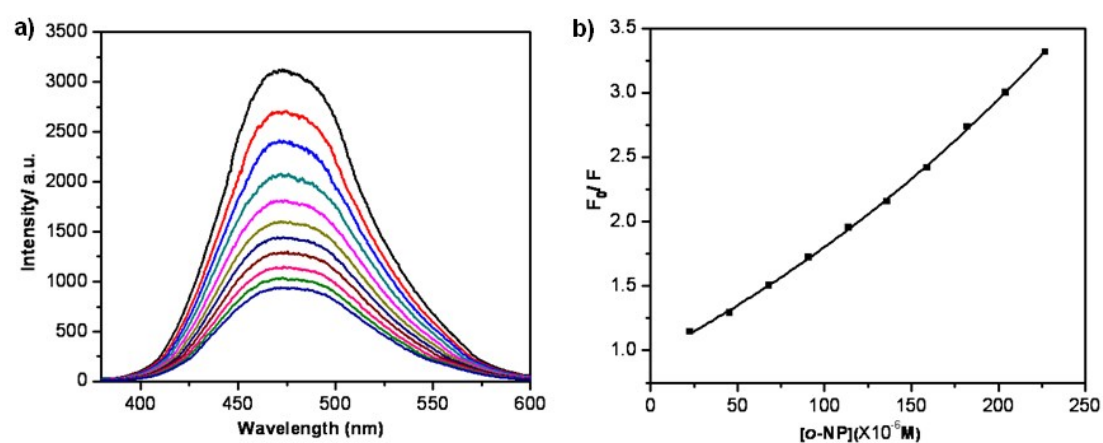

**Fig. S14** (a) Emission spectra ( $\lambda_{\text{ex}} = 350$  nm) of **1a** ( $4.5 \times 10^{-6}$  M) in presence of *o*-NP at various concentration (0, 5, 10, 15, 20, 25, 30, 35, 40, 45 and 50 equiv.). (b) The nonlinear curve-fitting for the quenching constant of **1a** with *o*-NP.

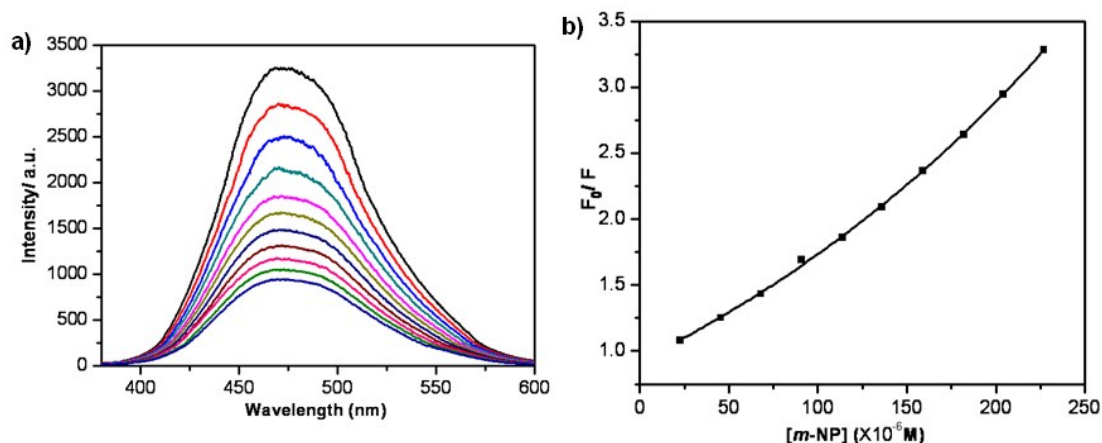

**Fig. S15** (a) Emission spectra ( $\lambda_{\text{ex}} = 350$  nm) of **1a** ( $4.5 \times 10^{-6}$  M) in presence of *m*-NP at various concentration (0, 5, 10, 15, 20, 25, 30, 35, 40, 45 and 50 equiv.). (b) The nonlinear curve-fitting for the quenching constant of **1a** with *m*-NP.

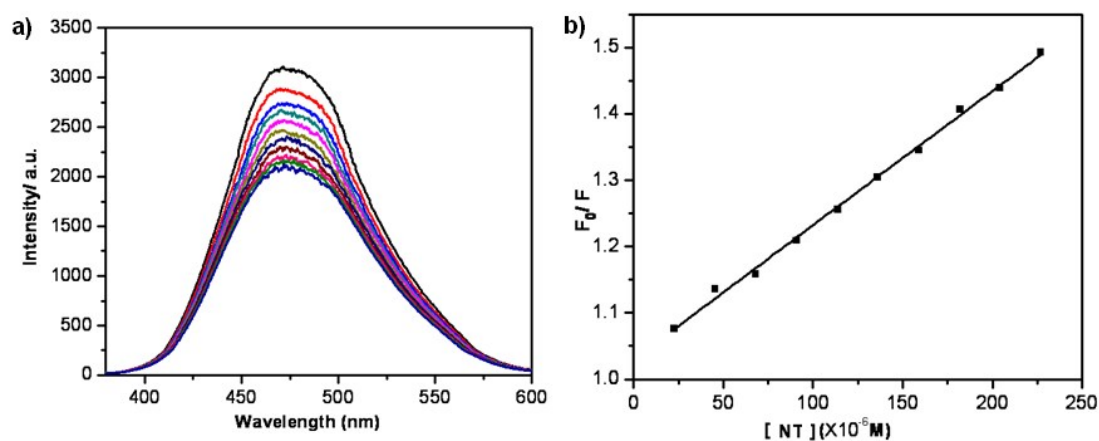

**Fig. S16** (a) Emission spectra ( $\lambda_{\text{ex}} = 350$  nm) of **1a** ( $4.5 \times 10^{-6}$  M) in presence of NT at various concentration (0, 5, 10, 15, 20, 25, 30, 35, 40, 45 and 50 equiv.). (b) The nonlinear curve-fitting for the quenching constant of **1a** with NT.

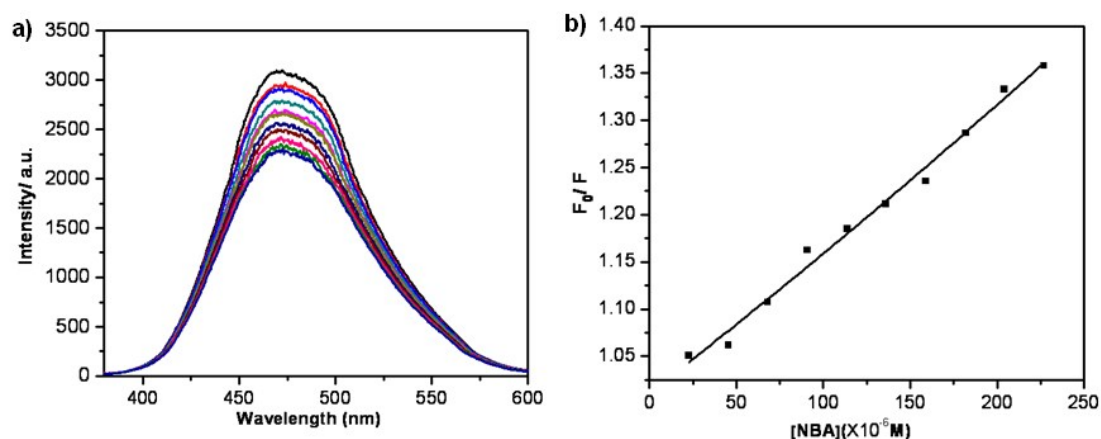

**Fig. S17** (a) Emission spectra ( $\lambda_{\text{ex}} = 350$  nm) of **1a** ( $4.5 \times 10^{-6}$  M) in presence of NBA at various concentration (0, 5, 10, 15, 20, 25, 30, 35, 40, 45 and 50 equiv.). (b) The nonlinear curve-fitting for the quenching constant of **1a** with NBA.

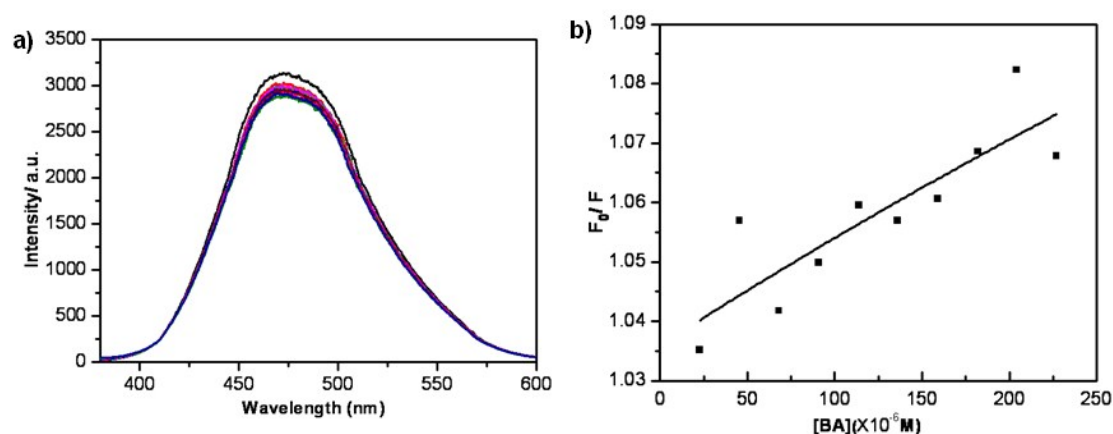

**Fig S18** (a) Emission spectra ( $\lambda_{\text{ex}} = 350$  nm) of **1a** ( $4.5 \times 10^{-6}$  M) in presence of BA at various concentration (0, 5, 10, 15, 20, 25, 30, 35, 40, 45 and 50 equiv.). (b) The nonlinear curve-fitting for the quenching constant of **1a** with BA.

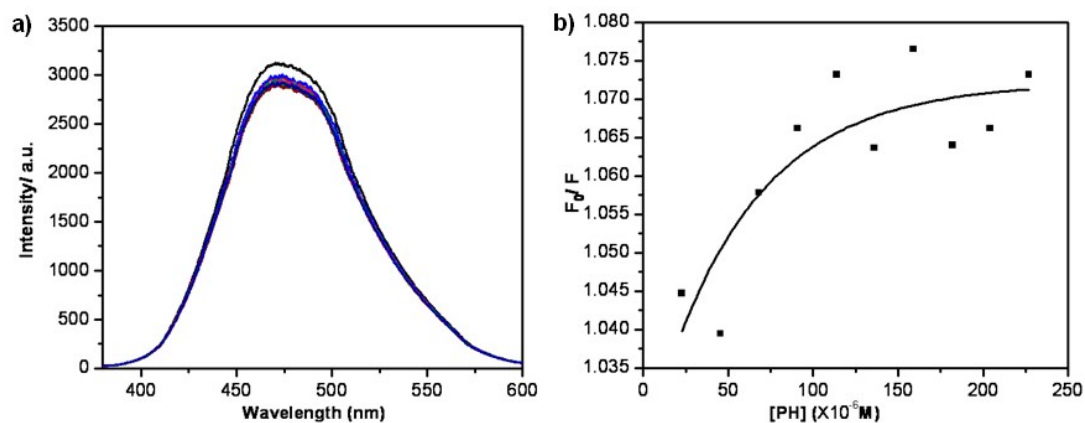

**Fig. S19** (a) Emission spectra ( $\lambda_{\text{ex}} = 350 \text{ nm}$ ) of **1a** ( $4.5 \times 10^{-6} \text{ M}$ ) in presence of PH at various concentration (0, 5, 10, 15, 20, 25, 30, 35, 40, 45 and 50 equiv.). (b) The nonlinear curve-fitting for the quenching constant of **1a** with PH.

Table S1. Summary of fluorescence quenching constants of **1a**.

| Quencher              | TNP               | DNP               | <i>p</i> -NP      | <i>o</i> -NP      | <i>m</i> -NP      | NT                | NBA               | BA                | PH                |
|-----------------------|-------------------|-------------------|-------------------|-------------------|-------------------|-------------------|-------------------|-------------------|-------------------|
| K ( $\text{M}^{-1}$ ) | $1.7 \times 10^4$ | $5.8 \times 10^3$ | $6.0 \times 10^3$ | $5.2 \times 10^3$ | $5.4 \times 10^3$ | $1.6 \times 10^3$ | $1.3 \times 10^3$ | $1.6 \times 10^2$ | $1.3 \times 10^2$ |

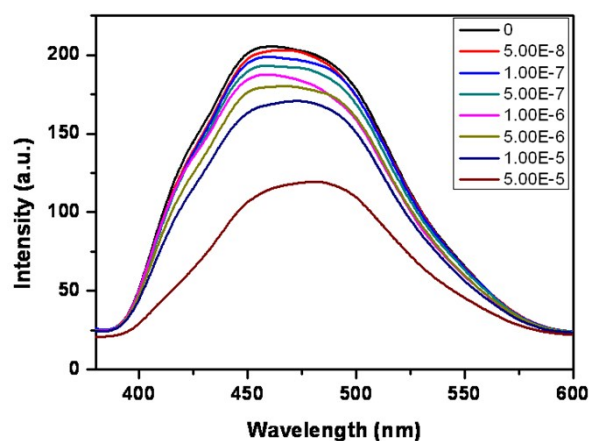

**Fig. S20** Changes in the fluorescence spectra of **1a** ( $5.0 \times 10^{-7} \text{ M}$ ) with different concentrations of TNP.
